# Supplementary material
Source: bioRxiv or medRxiv preprint supplement (https://www.biorxiv.org/highwire/filestream/6027/field_highwire_adjunct_files/12/022889-9.pdf)
Supplement: Supplementary file [file 022889-9.pdf]

**Additional File 9 Pairwise  $F_{ST}$  values estimated between populations. The matrix is symmetrical.**

| FST            | South_Africa | East_Africa | West_Africa | Europe | Caucasus | West_Asia | Central_Asia | North_India | South_India | East_Asia | South_Asia | Malaysia | Borneo | Sumatra | East_Indonesia | Philippine | Moluccas | Australia | New_Guinea | Fiji | Polynesia | Onge | Jehai | Mamanwa |
|----------------|--------------|-------------|-------------|--------|----------|-----------|--------------|-------------|-------------|-----------|------------|----------|--------|---------|----------------|------------|----------|-----------|------------|------|-----------|------|-------|---------|
| South_Africa   | 0.00         | 0.02        | 0.02        | 0.16   | 0.15     | 0.14      | 0.15         | 0.14        | 0.14        | 0.18      | 0.17       | 0.18     | 0.18   | 0.19    | 0.17           | 0.19       | 0.18     | 0.22      | 0.25       | 0.19 | 0.20      | 0.23 | 0.19  | 0.20    |
| East_Africa    | 0.02         | 0.00        | 0.01        | 0.13   | 0.12     | 0.12      | 0.13         | 0.12        | 0.12        | 0.16      | 0.15       | 0.15     | 0.16   | 0.16    | 0.15           | 0.16       | 0.16     | 0.19      | 0.22       | 0.16 | 0.18      | 0.20 | 0.17  | 0.17    |
| West_Africa    | 0.02         | 0.01        | 0.00        | 0.15   | 0.15     | 0.14      | 0.15         | 0.14        | 0.14        | 0.18      | 0.17       | 0.17     | 0.17   | 0.18    | 0.17           | 0.18       | 0.17     | 0.21      | 0.23       | 0.18 | 0.19      | 0.22 | 0.19  | 0.19    |
| Europe         | 0.16         | 0.13        | 0.15        | 0.00   | 0.01     | 0.02      | 0.05         | 0.04        | 0.05        | 0.11      | 0.09       | 0.10     | 0.11   | 0.11    | 0.10           | 0.11       | 0.11     | 0.15      | 0.18       | 0.12 | 0.13      | 0.15 | 0.12  | 0.13    |
| Caucasus       | 0.15         | 0.12        | 0.15        | 0.01   | 0.00     | 0.01      | 0.05         | 0.03        | 0.04        | 0.10      | 0.08       | 0.09     | 0.10   | 0.10    | 0.09           | 0.10       | 0.10     | 0.15      | 0.18       | 0.11 | 0.12      | 0.15 | 0.11  | 0.12    |
| West_Asia      | 0.14         | 0.12        | 0.14        | 0.02   | 0.01     | 0.00      | 0.03         | 0.01        | 0.01        | 0.08      | 0.06       | 0.07     | 0.08   | 0.08    | 0.07           | 0.08       | 0.08     | 0.13      | 0.16       | 0.09 | 0.10      | 0.13 | 0.09  | 0.10    |
| Central_Asia   | 0.15         | 0.13        | 0.15        | 0.05   | 0.05     | 0.03      | 0.00         | 0.03        | 0.04        | 0.02      | 0.02       | 0.04     | 0.03   | 0.04    | 0.04           | 0.04       | 0.04     | 0.12      | 0.16       | 0.07 | 0.07      | 0.12 | 0.07  | 0.07    |
| North_India    | 0.14         | 0.12        | 0.14        | 0.04   | 0.03     | 0.01      | 0.03         | 0.00        | 0.00        | 0.07      | 0.05       | 0.06     | 0.06   | 0.07    | 0.06           | 0.07       | 0.06     | 0.11      | 0.15       | 0.08 | 0.09      | 0.11 | 0.08  | 0.09    |
| South_India    | 0.14         | 0.12        | 0.14        | 0.05   | 0.04     | 0.01      | 0.04         | 0.00        | 0.00        | 0.07      | 0.05       | 0.06     | 0.06   | 0.07    | 0.06           | 0.07       | 0.06     | 0.11      | 0.14       | 0.08 | 0.09      | 0.11 | 0.08  | 0.08    |
| East_Asia      | 0.18         | 0.16        | 0.18        | 0.11   | 0.10     | 0.08      | 0.02         | 0.07        | 0.07        | 0.00      | 0.01       | 0.03     | 0.02   | 0.02    | 0.04           | 0.03       | 0.04     | 0.14      | 0.16       | 0.07 | 0.06      | 0.13 | 0.07  | 0.06    |
| South_Asia     | 0.17         | 0.15        | 0.17        | 0.09   | 0.08     | 0.06      | 0.02         | 0.05        | 0.05        | 0.01      | 0.00       | 0.02     | 0.01   | 0.01    | 0.03           | 0.02       | 0.03     | 0.13      | 0.16       | 0.06 | 0.05      | 0.12 | 0.05  | 0.05    |
| Malaysia       | 0.18         | 0.15        | 0.17        | 0.10   | 0.09     | 0.07      | 0.04         | 0.06        | 0.06        | 0.03      | 0.02       | 0.00     | 0.02   | 0.03    | 0.04           | 0.03       | 0.04     | 0.14      | 0.18       | 0.07 | 0.06      | 0.14 | 0.06  | 0.07    |
| Borneo         | 0.18         | 0.16        | 0.17        | 0.11   | 0.10     | 0.08      | 0.03         | 0.06        | 0.06        | 0.02      | 0.01       | 0.02     | 0.00   | 0.01    | 0.03           | 0.02       | 0.03     | 0.13      | 0.16       | 0.07 | 0.05      | 0.13 | 0.06  | 0.06    |
| Sumatra        | 0.19         | 0.16        | 0.18        | 0.11   | 0.10     | 0.08      | 0.04         | 0.07        | 0.07        | 0.02      | 0.01       | 0.03     | 0.01   | 0.00    | 0.03           | 0.02       | 0.03     | 0.15      | 0.18       | 0.07 | 0.05      | 0.14 | 0.07  | 0.06    |
| East_Indonesia | 0.17         | 0.15        | 0.17        | 0.10   | 0.09     | 0.07      | 0.04         | 0.06        | 0.06        | 0.04      | 0.03       | 0.04     | 0.03   | 0.03    | 0.00           | 0.03       | 0.01     | 0.08      | 0.10       | 0.03 | 0.04      | 0.14 | 0.07  | 0.06    |
| Philippine     | 0.19         | 0.16        | 0.18        | 0.11   | 0.10     | 0.08      | 0.04         | 0.07        | 0.07        | 0.03      | 0.02       | 0.03     | 0.02   | 0.02    | 0.03           | 0.00       | 0.03     | 0.14      | 0.18       | 0.07 | 0.05      | 0.15 | 0.08  | 0.05    |
| Moluccas       | 0.18         | 0.16        | 0.17        | 0.11   | 0.10     | 0.08      | 0.04         | 0.06        | 0.06        | 0.04      | 0.03       | 0.04     | 0.03   | 0.03    | 0.01           | 0.03       | 0.00     | 0.10      | 0.11       | 0.03 | 0.04      | 0.14 | 0.08  | 0.06    |
| Australia      | 0.22         | 0.19        | 0.21        | 0.15   | 0.15     | 0.13      | 0.12         | 0.11        | 0.11        | 0.14      | 0.13       | 0.14     | 0.13   | 0.15    | 0.08           | 0.14       | 0.10     | 0.00      | 0.08       | 0.07 | 0.13      | 0.20 | 0.16  | 0.15    |
| New_Guinea     | 0.25         | 0.22        | 0.23        | 0.18   | 0.18     | 0.16      | 0.16         | 0.15        | 0.14        | 0.16      | 0.16       | 0.18     | 0.16   | 0.18    | 0.10           | 0.18       | 0.11     | 0.08      | 0.00       | 0.07 | 0.15      | 0.23 | 0.20  | 0.18    |
| Fiji           | 0.19         | 0.16        | 0.18        | 0.12   | 0.11     | 0.09      | 0.07         | 0.08        | 0.08        | 0.07      | 0.06       | 0.07     | 0.07   | 0.07    | 0.03           | 0.07       | 0.03     | 0.07      | 0.07       | 0.00 | 0.03      | 0.15 | 0.10  | 0.09    |
| Polynesia      | 0.20         | 0.18        | 0.19        | 0.13   | 0.12     | 0.10      | 0.07         | 0.09        | 0.09        | 0.06      | 0.05       | 0.06     | 0.05   | 0.05    | 0.04           | 0.05       | 0.04     | 0.13      | 0.15       | 0.03 | 0.00      | 0.16 | 0.10  | 0.08    |
| Onge           | 0.23         | 0.20        | 0.22        | 0.15   | 0.15     | 0.13      | 0.12         | 0.11        | 0.11        | 0.13      | 0.12       | 0.14     | 0.13   | 0.14    | 0.14           | 0.15       | 0.14     | 0.20      | 0.23       | 0.15 | 0.16      | 0.00 | 0.16  | 0.17    |
| Jehai          | 0.19         | 0.17        | 0.19        | 0.12   | 0.11     | 0.09      | 0.07         | 0.08        | 0.08        | 0.07      | 0.05       | 0.06     | 0.06   | 0.07    | 0.07           | 0.08       | 0.08     | 0.16      | 0.20       | 0.10 | 0.10      | 0.16 | 0.00  | 0.10    |
| Mamanwa        | 0.20         | 0.17        | 0.19        | 0.13   | 0.12     | 0.10      | 0.07         | 0.09        | 0.08        | 0.06      | 0.05       | 0.07     | 0.06   | 0.06    | 0.06           | 0.05       | 0.06     | 0.15      | 0.18       | 0.09 | 0.08      | 0.17 | 0.10  | 0.00    |
